# Supplementary material
Source: publisher site journal article supplement (https://www.spandidos-publications.com/4284/downloadSupplementary)

Figure S1. Associations between ISG15 expression and other factors. (A) The association between ISG15 mRNA expression and a list of pathological factors in samples from The Cancer Genome Atlas. The sample information was finished using the online website MEXPRESS. Each grid represents a patient, and the expression of ISG15 increases gradually from left to right, with the P-value of each pathological factor shown on the right. (B) Analysis of association between methylation of CpG site in the ISG15 promoter region and the mRNA expression of ISG15. (C) The association between ISG15 mRNA expression and tumor stage in EC. ISG15, interferon-stimulated gene 15.

A

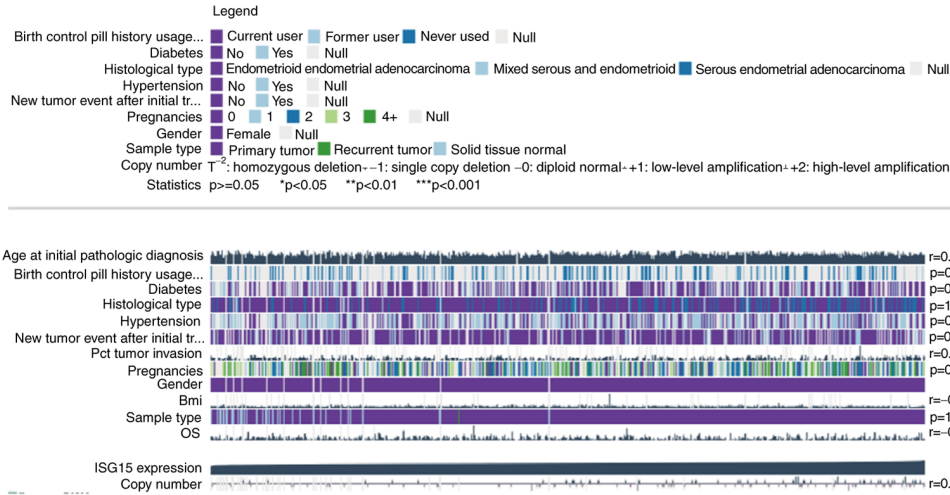

B

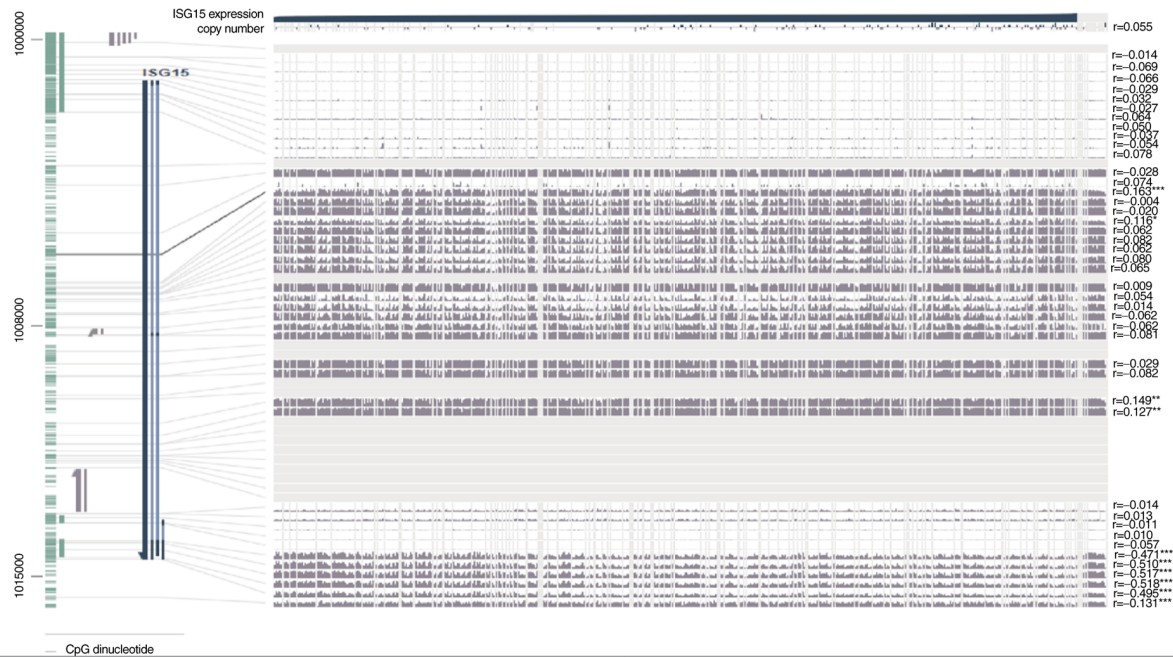

C

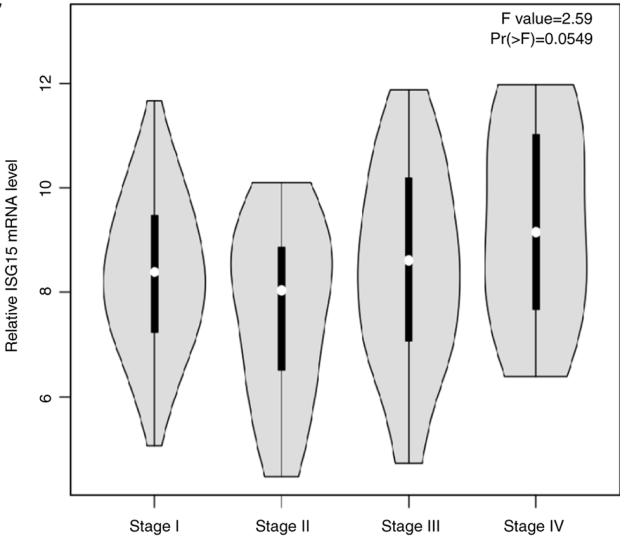

Supplement: Supplementary file 1 [file downloadSupplementary]
